# Supplementary material
Source: publisher site journal article supplement (https://www.dovepress.com/article/529775)

**Figure S1. The trial flowchart.**

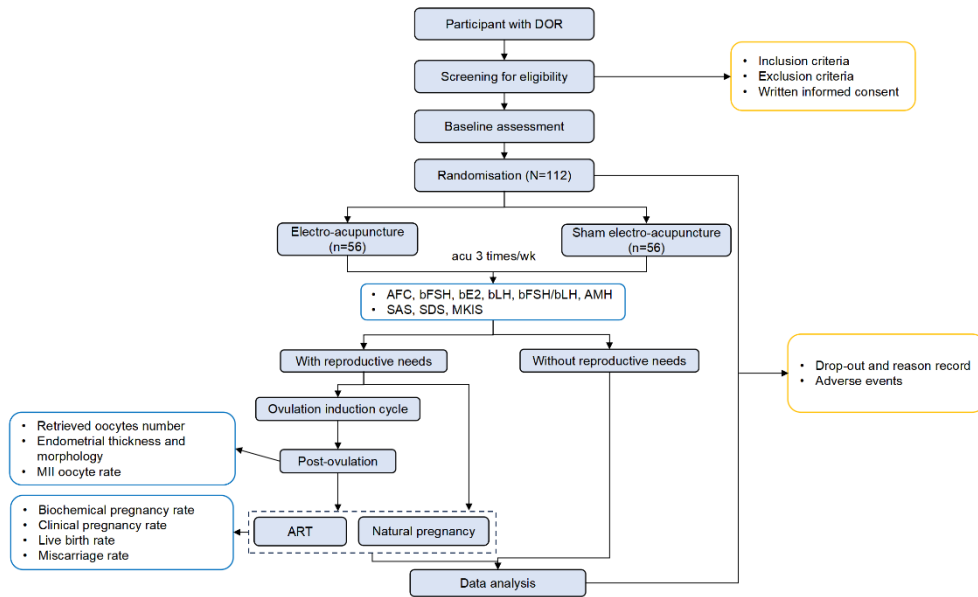

DOR diminished ovarian reserve; Acu, acupuncture; wk, week; AMH, anti-Müllerian hormone; AFC, antral follicle count; ART, assisted reproductive technology; bFSH, basal follicle-stimulating hormone; bE<sub>2</sub>, basal estradiol; bLH, basal luteinizing hormon. SAS, Self-Rating Anxiety Scale; SDS, Self-Rating Depression Scale; MKIS, Modified Kupperman Index scores

**Figure S2. Study period.**

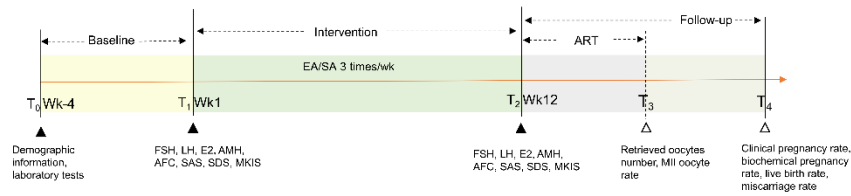

EA, electro-acupuncture; SA, sham electro-acupuncture; T, time points for assessments within the study;  $\blacktriangle$ : indicators that all subjects will be measured;  $\triangle$  indicators that subjects undergoing ART cycles or natural conception plan will be measured.

**Figure S3. Location of the electro-acupuncture group acupoints.**

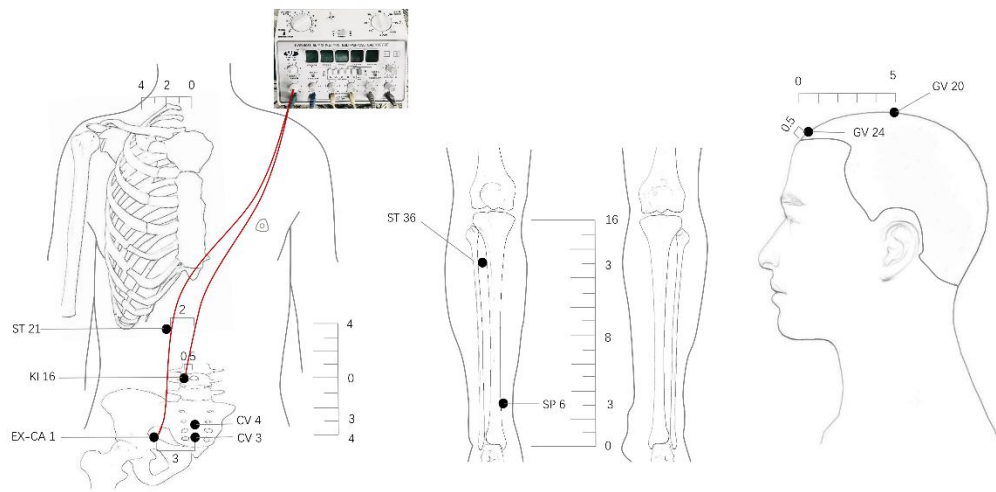

**Figure S4. Location of the sham electro-acupuncture group points.**

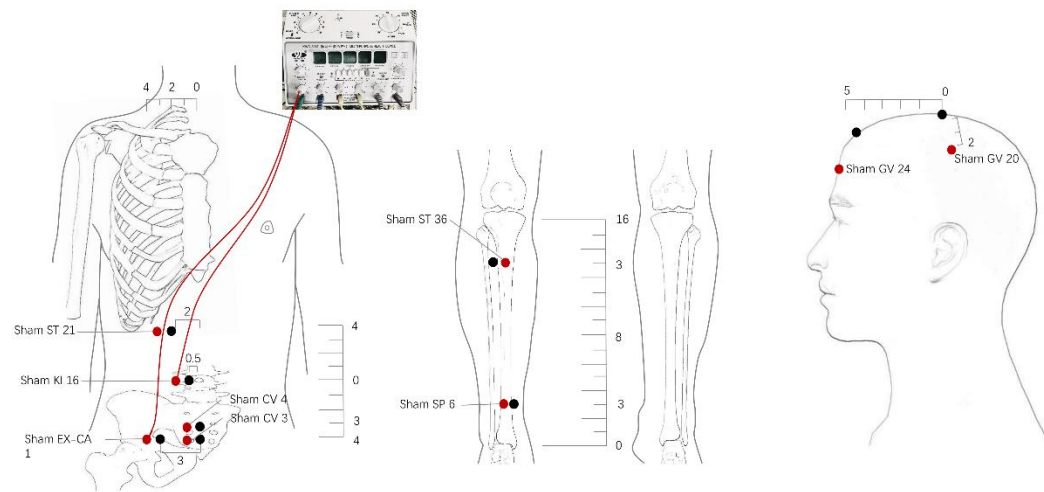

Supplement: Supplementary file 1 [file 529775%20Revised%20Supplementary%20Materials.pdf]
